# Supplementary material for: Metabolic Engineering of Tobacco for Heterologous Production of Rare Ginsenosides CK and Rh2
Source: Research Square preprint supplement (doi:10.21203/rs.3.rs-8043439/v1), 2025-12-11
Supplement: Supplementary file 2 [file b81c541a3acd4fa731e38a3b.xlsx]

## Sheet: Sheet1
Table S1. Transgenic Positive Tobacco Lines for Heterologous Synthesis of Rare Ginsenosides CK and Rh2
Ginsenoside	CK		Rh2
Plant Chassis	N. benthamiana	K326	N.benthamiana	K326
Vector	PgDDS+CYP716A47+UGTPg1		PgDDS+CYP716A47+UGTPg45
Screening rate	6/140	9/130	8/130	4/170
Transgenic Positive Lines	N08-7	P8-7	N18-1	P23-1
	N14-1	P8-8	N18-8	P23-3
	N14-7	P8-10	N19-5	P23-4
	N14-8	P9-8	N26-2	P29-3
	N14-9	P12-10	N26-3
	N14-10	P13-3	N26-4
		P13-4	N26-9
		P13-5	N26-10
		P13-8
